# Supplementary material for: Quantified forces between HepG2 hepatocarcinoma and WA07 pluripotent stem cells with natural biomaterials correlate with in vitro cell behavior
Source: PubMed Central journal article supplement (PMC6517585; doi:10.1038/s41598-019-43669-7), 2019-05-14
Supplement: 41598_2019_43669_MOESM1_ESM.pdf [file 41598_2019_43669_MOESM1_ESM.pdf]

## Supplementary Information

### Quantified forces between HepG2 hepatocarcinoma and WA07 pluripotent stem cells with natural biomaterials correlate with *in vitro* cell behavior

Riina Harjumäki<sup>1,2</sup>, Robertus Wahyu N. Nugroho<sup>1</sup>, Xue Zhang<sup>1</sup>, Yan-Ru Lou<sup>2</sup>, Marjo Yliperttula<sup>2,3</sup>, Juan José Valle-Delgado<sup>1\*</sup>, Monika Österberg<sup>1\*</sup>

<sup>1</sup>Department of Bioproducts and Biosystems, School of Chemical Engineering, Aalto University, FI-00076 Aalto, Finland

<sup>2</sup>Division of Pharmaceutical Biosciences, Faculty of Pharmacy, University of Helsinki, FI-00014 Helsinki, Finland

<sup>3</sup>Department of Pharmaceutical and Pharmacological Sciences, University of Padova, I-35131 Padova, Italy

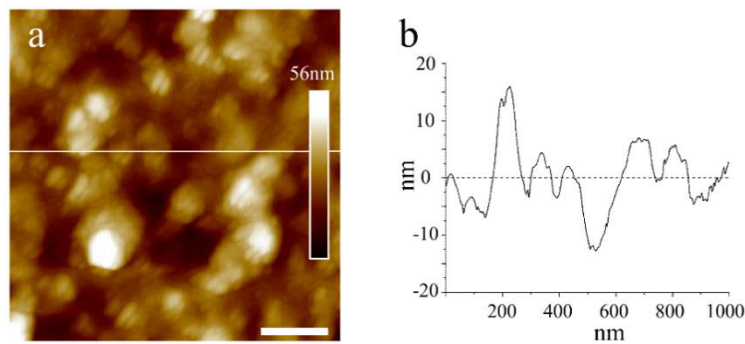

**Figure S1.** High-resolution image of an uncoated glass colloidal probe: (a) AFM height image (scale bar 200 nm); (b) topographic profile corresponding to the line marked in (a).

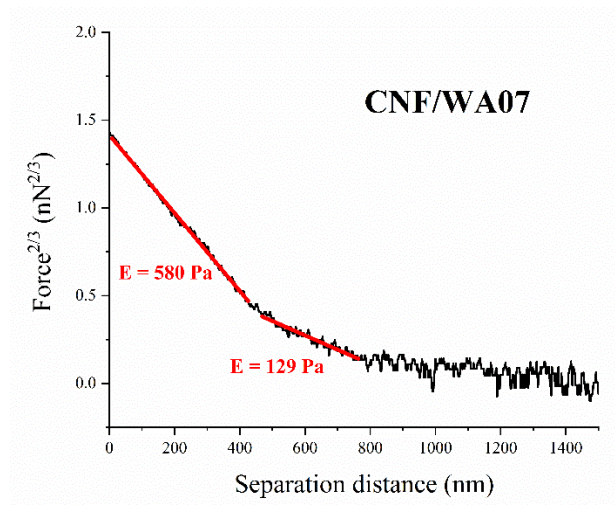

**Figure S2.** Analysis of WA07 cell elasticity from a representative approach force curve obtained when measuring the interaction between WA07 cells and cellulose nanofibrils (CNF).

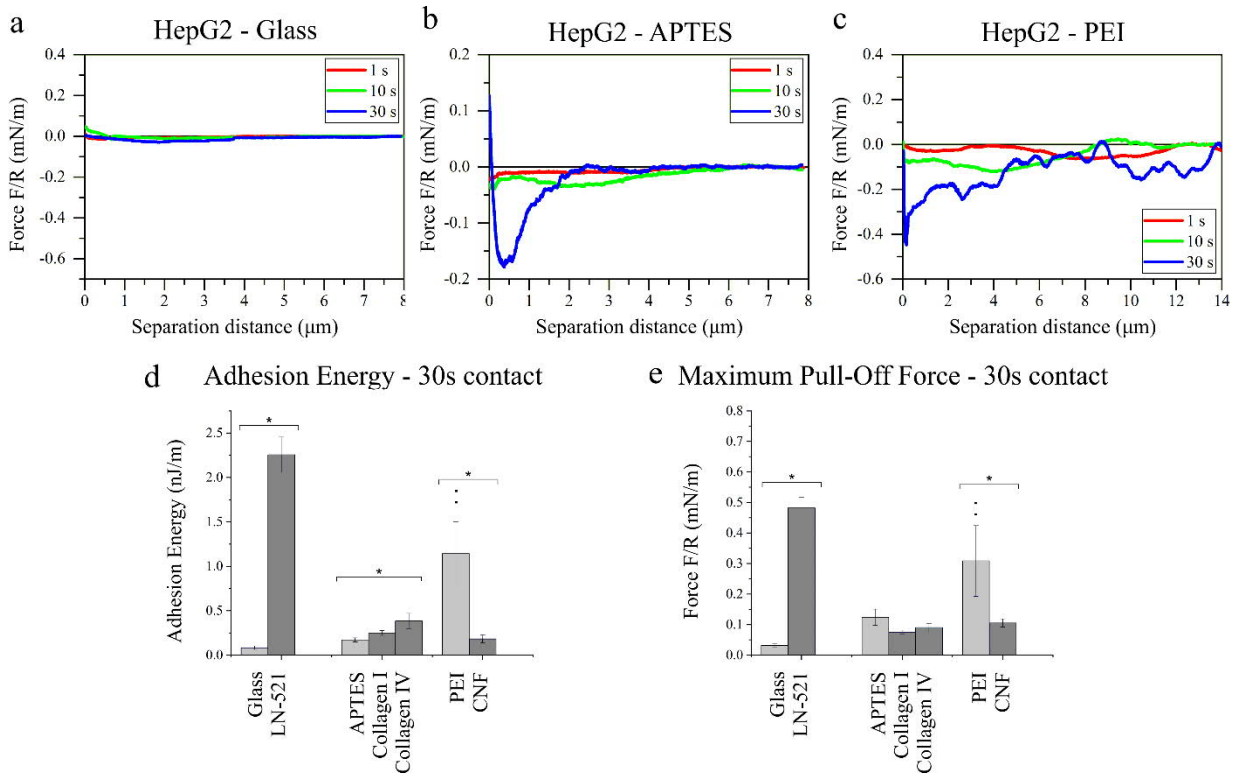

**Figure S3.** Retraction force curves, adhesion energy and maximum pull-off forces between HepG2 cells and control probes. Representative force curves for (a) uncoated glass probe and probes coated with (b) (3-aminopropyl)triethoxysilane (APTES) and (c) polyethyleneimine (PEI) are presented normalized by the probe radius  $R$  (Table S3) after different cells-probes contact times (1 s, 10 s, and 30 s). Comparison of adhesion energies (d) and maximum pull-off forces (e) at contact time of 30 s. Error bars are standard errors of mean and significant differences of  $p \leq 0.05$  are marked with \*. Values were normalized by the probe radius  $R$ .

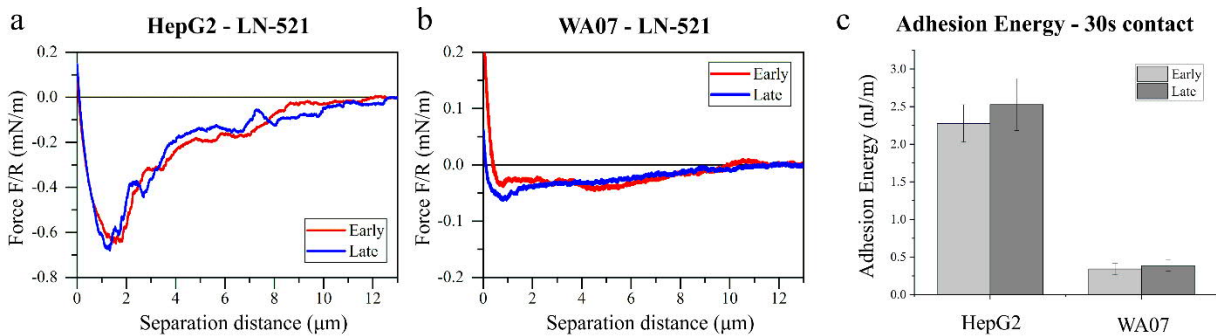

**Figure S4.** Examples of measurement reproducibility for the interactions between HepG2 and WA07 cells with LN-521 after 30 s contact time. Representative force curves at different locations of the same cell plate are presented for (a) HepG2 and (b) WA07, normalized by the probe radius  $R$ . Force curves at the first location (early) were obtained within the first 45 min or 30 min of the experiment for HepG2 and WA07, respectively. Force curves at the second location (late) were obtained within the last hour of the experiment (experiment duration up to 2 h or 1.5 h for HepG2 and WA07, respectively). Mean values of the corresponding adhesion energy for all the force curves obtained at the first (early) and second (late) locations are shown in (c), normalized by the probe radius  $R$ . Error bars are standard errors of mean. No significant differences ( $p > 0.05$ ) were observed between early and late results.

**Table S1.** Adhesion energies and maximum pull-off forces for HepG2 (a,c,e) and WA07 (b,d,f) cell interactions with collagen I (Col I), collagen IV (Col IV), cellulose nanofibrils (CNF), and laminin-521 (LN-521) at contact times of 1, 10 and 30 seconds. Mean values and standard errors of the mean (SEM) are shown.

| <b>a HepG2 - 1s Contact</b> |                                 |                                   |            |                      |                               |            |
|-----------------------------|---------------------------------|-----------------------------------|------------|----------------------|-------------------------------|------------|
|                             | Number of force curves analyzed | Normalised adhesion energy (nJ/m) | SEM (nJ/m) | Adhesion energy (nJ) | Maximum pull-off force (mN/m) | SEM (mN/m) |
| Col I                       | 37                              | 0.168                             | 0.027      | 2.54                 | 0.051                         | 0.008      |
| Col IV                      | 21                              | 0.319                             | 0.042      | 4.32                 | 0.074                         | 0.008      |
| CNF                         | 24                              | 0.122                             | 0.026      | 1.79                 | 0.085                         | 0.012      |
| LN-521                      | 23                              | 0.938                             | 0.138      | 13.7                 | 0.199                         | 0.025      |

| <b>b WA07 - 1s Contact</b> |                                 |                                   |            |                      |                               |            |
|----------------------------|---------------------------------|-----------------------------------|------------|----------------------|-------------------------------|------------|
|                            | Number of force curves analyzed | Normalised adhesion energy (nJ/m) | SEM (nJ/m) | Adhesion energy (nJ) | Maximum pull-off force (mN/m) | SEM (mN/m) |
| Col I                      | 10                              | 0.06                              | 0.008      | 0.88                 | 0.016                         | 0.002      |
| Col IV                     | 20                              | 0.026                             | 0.004      | 0.319                | 0.013                         | 0.002      |
| CNF                        | 48                              | 0.098                             | 0.012      | 1.2                  | 0.032                         | 0.002      |
| LN-521                     | 48                              | 0.231                             | 0.038      | 2.19                 | 0.053                         | 0.007      |

| <b>c HepG2 - 10s Contact</b> |                                 |                                   |            |                      |                               |            |
|------------------------------|---------------------------------|-----------------------------------|------------|----------------------|-------------------------------|------------|
|                              | Number of force curves analyzed | Normalised adhesion energy (nJ/m) | SEM (nJ/m) | Adhesion energy (nJ) | Maximum pull-off force (mN/m) | SEM (mN/m) |
| Col I                        | 29                              | 0.213                             | 0.019      | 3.24                 | 0.069                         | 0.007      |
| Col IV                       | 13                              | 0.374                             | 0.056      | 5.08                 | 0.09                          | 0.01       |
| CNF                          | 24                              | 0.153                             | 0.03       | 2.25                 | 0.097                         | 0.014      |
| LN-521                       | 20                              | 1.151                             | 0.14       | 16.8                 | 0.24                          | 0.027      |

| <b>d WA07 - 10s Contact</b> |                                 |                                   |            |                      |                               |            |
|-----------------------------|---------------------------------|-----------------------------------|------------|----------------------|-------------------------------|------------|
|                             | Number of force curves analyzed | Normalised adhesion energy (nJ/m) | SEM (nJ/m) | Adhesion energy (nJ) | Maximum pull-off force (mN/m) | SEM (mN/m) |
| Col I                       | 11                              | 0.051                             | 0.012      | 0.747                | 0.015                         | 0.003      |
| Col IV                      | 21                              | 0.075                             | 0.013      | 0.91                 | 0.03                          | 0.004      |
| CNF                         | 44                              | 0.13                              | 0.016      | 1.43                 | 0.044                         | 0.004      |
| LN-521                      | 29                              | 0.317                             | 0.042      | 3.14                 | 0.066                         | 0.006      |

| <b>e HepG2 - 30s Contact</b> |                                 |                                   |            |                      |                               |            |
|------------------------------|---------------------------------|-----------------------------------|------------|----------------------|-------------------------------|------------|
|                              | Number of force curves analyzed | Normalised adhesion energy (nJ/m) | SEM (nJ/m) | Adhesion energy (nJ) | Maximum pull-off force (mN/m) | SEM (mN/m) |
| Col I                        | 22                              | 0.249                             | 0.028      | 3.9                  | 0.074                         | 0.006      |
| Col IV                       | 11                              | 0.384                             | 0.087      | 5.27                 | 0.09                          | 0.014      |
| CNF                          | 26                              | 0.182                             | 0.043      | 2.68                 | 0.045                         | 0.014      |
| LN-521                       | 18                              | 2.256                             | 0.199      | 33.0                 | 0.482                         | 0.035      |

| <b>f WA07 - 30s Contact</b> |                                 |                                   |            |                      |                               |            |
|-----------------------------|---------------------------------|-----------------------------------|------------|----------------------|-------------------------------|------------|
|                             | Number of force curves analyzed | Normalised adhesion energy (nJ/m) | SEM (nJ/m) | Adhesion energy (nJ) | Maximum pull-off force (mN/m) | SEM (mN/m) |
| Col I                       | 12                              | 0.207                             | 0.026      | 3.039                | 0.039                         | 0.005      |
| Col IV                      | 22                              | 0.072                             | 0.011      | 0.874                | 0.027                         | 0.003      |
| CNF                         | 46                              | 0.16                              | 0.026      | 1.96                 | 0.055                         | 0.006      |
| LN-521                      | 27                              | 0.379                             | 0.041      | 3.76                 | 0.1                           | 0.016      |

**Table S2.** Radii ( $\mu\text{m}$ ) of the used colloidal probes for force measurements between HepG2 (a) and WA07 (b) cells and collagen I (Col I), collagen IV (Col IV), cellulose nanofibrils (CNF), and laminin-521 (LN-521).

| <b>a HepG2</b> |             |  |
|----------------|-------------|--|
| Col I          | 13.0 - 19.2 |  |
| Col IV         | 13.5 - 14.4 |  |
| CNF            | 10.3        |  |
| LN-521         | 14.6        |  |

| <b>b WA07</b> |            |  |
|---------------|------------|--|
| Col I         | 14.7       |  |
| Col IV        | 12.2       |  |
| CNF           | 10.3       |  |
| LN-521        | 8.2 - 10.2 |  |

**Table S3.** Adhesion energies and maximum pull-off forces for HepG2 cell interactions with uncoated, APTES-coated, and PEI-coated glass probes after 1 s (a), 10 s (b), and 30 s (c) contact times. The radii of used colloidal probes ( $\mu\text{m}$ ) are presented in (d). Mean values and standard errors of the mean (SEM) are shown.

| <b>a HepG2 - Controls 1s Contact</b> |                                 |                                   |            |                      |                               |            |
|--------------------------------------|---------------------------------|-----------------------------------|------------|----------------------|-------------------------------|------------|
|                                      | Number of force curves analyzed | Normalised adhesion energy (nJ/m) | SEM (nJ/m) | Adhesion energy (nJ) | Maximum pull-off force (mN/m) | SEM (mN/m) |
| Glass                                | 18                              | 0.023                             | 0.007      | 0.363                | 0.011                         | 0.002      |
| APTES                                | 12                              | 0.043                             | 0.008      | 0.561                | 0.018                         | 0.002      |
| PEI                                  | 7                               | 0.659                             | 0.192      | 7.22                 | 0.150                         | 0.048      |

| <b>b HepG2 - Controls 10s Contact</b> |                                 |                                   |            |                      |                               |            |
|---------------------------------------|---------------------------------|-----------------------------------|------------|----------------------|-------------------------------|------------|
|                                       | Number of force curves analyzed | Normalised adhesion energy (nJ/m) | SEM (nJ/m) | Adhesion energy (nJ) | Maximum pull-off force (mN/m) | SEM (mN/m) |
| Glass                                 | 17                              | 0.030                             | 0.007      | 0.460                | 0.015                         | 0.002      |
| APTES                                 | 6                               | 0.090                             | 0.042      | 1.175                | 0.042                         | 0.013      |
| PEI                                   | 5                               | 0.446                             | 0.193      | 4.88                 | 0.086                         | 0.027      |

| <b>c HepG2 - Controls 30s Contact</b> |                                 |                                   |            |                      |                               |            |
|---------------------------------------|---------------------------------|-----------------------------------|------------|----------------------|-------------------------------|------------|
|                                       | Number of force curves analyzed | Normalised adhesion energy (nJ/m) | SEM (nJ/m) | Adhesion energy (nJ) | Maximum pull-off force (mN/m) | SEM (mN/m) |
| Glass                                 | 15                              | 0.083                             | 0.020      | 1.30                 | 0.032                         | 0.005      |
| APTES                                 | 7                               | 0.172                             | 0.026      | 2.24                 | 0.124                         | 0.026      |
| PEI                                   | 7                               | 1.143                             | 0.320      | 12.52                | 0.309                         | 0.105      |

| <b>d Radii of Control Probes</b> |             |           |
|----------------------------------|-------------|-----------|
| HepG2                            | Glass probe | 15.6      |
|                                  | APTES       | 13.1-13.5 |
|                                  | PEI         | 11.0-13.4 |
